# Supplementary material for: Frailty Assessment for Risk Stratification in Pancreatic Surgery
Source: Research Square preprint supplement (doi:10.21203/rs.3.rs-7086784/v1), 2025-07-15
Supplement: Supplementary file 1 [file 836a5d30c6a94de92a96a324.docx]

## **Supplementary tables**

**Supplementary Table 1 Postoperative outcomes after pancreatoduodenectomy.** ICU (intensive care unit).

| **Variable** | **Frail**  **N=19** | **Non Frail**  **N=99** | **P Value** |
| --- | --- | --- | --- |
| Hospital length of stay (after surgery), days, median (interquartile range) | 18 (12-33) | 20 (14 – 28) | 0.991 |
| ICU stay, days, median (interquartile range) | 3 (0-8) | 1 (0-3) | 0.093 |
| Complication graded by Clavien Dindo (CD), N (%) |  |  |  |
| CD1-2 | 13 (68) | 57 (58) | 0.378 |
| CD3-5 | 5 (26) | 26 (26) | 1.0 |
| Comprehensive complication index, median (interquartile range) | 21 (10-44) | 21 (9-34) | 0.367 |
| 30-day mortality | 0 | 0 |  |
| 90-day mortality | 0 | 3 | 1.0 |
| Total costs, CHF, median, IQR | 58k (38k – 114k) | 51k (42k-83k) | 0.530 |

**Supplementary Table 2 Postoperative outcomes after distal pancreatectomy.** ICU (intensive care unit).

| **Variable** | **Frail**  **N=3** | **Non Frail**  **N=49** | **P Value** |
| --- | --- | --- | --- |
| Hospital length of stay (after surgery), days, median (interquartile range) | 21 (14-44.5 | 10 (8-15) | 0.363 |
| ICU stay, days, median (interquartile range) | 3 (1.5-3) | 0 (0-1) | 0.167 |
| Complication graded by Clavien Dindo (CD), N (%) |  |  |  |
| CD1-2 | 0 (0) | 26 (53) | 0.235 |
| CD3-5 | 2 (67) | 8 (16) | 0.091 |
| Comprehensive complication index, median (interquartile range) | 35.9 (17.9-50.8) | 8.6 (0-24.2) | 0.323 |
| 30-day mortality | 0 | 0 |  |
| 90-day mortality | 0 | 1 (2) | 1.000 |
| Total costs, CHF, median, IQR | 35k (27k-82k) | 29k (22k-41k) | 0.769 |

**Supplementary Table 3 Postoperative outcomes after total pancreatectomy.** ICU (intensive care unit).

| **Variable** | **Frail**  **N=5** | **Non Frail**  **N=15** | **P Value** |
| --- | --- | --- | --- |
| Hospital length of stay (after surgery), days, median (interquartile range) | 11 (6-46.5 | 17 (12-28) | 0.672 |
| ICU stay, days, median (interquartile range) | 3 (1.5-9) | 3 (2-5) | 1.000 |
| Complication graded by Clavien Dindo (CD), N (%) |  |  |  |
| CD1-2 | 1 (20) | 8 (53.3) | 0.319 |
| CD3-5 | 4 (80) | 5 (33.3) | 0.127 |
| Comprehensive complication index, median (interquartile range) | 75 (36-100) | 15.6 (7-38) | **0.044** |
| 30-day mortality | 2 (40) | 1 (6.7) | 0.140 |
| 90-day mortality | 3 (60) | 1 (6.7) | **0.032** |
| Total costs, CHF, median, IQR | 60k (32k-17k) | 43k (40k-85k) | 0.933 |
